# Supplementary material
Source: PubMed Central journal article supplement (PMC4795165)
Supplement: NIHMS767416-supplement-Supplemental_Materials.pdf [file NIHMS767416-supplement-Supplemental_Materials.pdf]

## An NQO1 Substrate with Potent Antitumor Activity That Selectively Kills by PARP1-Induced Programmed Necrosis

Xiumei Huang<sup>1,2</sup>, Ying Dong<sup>1,2</sup>, Erik A. Bey<sup>1,2</sup>, Jessica A. Kilgore<sup>3</sup>, Joseph S. Bair<sup>4</sup>, Long-Shan Li<sup>1,2</sup>, Malina Patel<sup>1,2</sup>, Elizabeth I. Parkinson<sup>4</sup>, Yiguang Wang<sup>1</sup>, Noelle S. Williams<sup>3</sup>, Jinming Gao<sup>1</sup>, Paul J. Hergenrother<sup>4</sup>, and David A. Boothman<sup>1,2</sup>

### Abstract

Agents, such as  $\beta$ -lapachone, that target the redox enzyme, NAD(P)H:quinone oxidoreductase 1 (NQO1), to induce programmed necrosis in solid tumors have shown great promise, but more potent tumor-selective compounds are needed. Here, we report that deoxynyboquinone kills a wide spectrum of cancer cells in an NQO1-dependent manner with greater potency than  $\beta$ -lapachone. Deoxynyboquinone lethality relies on NQO1-dependent futile redox cycling that consumes oxygen and generates extensive reactive oxygen species (ROS). Elevated ROS levels cause extensive DNA lesions, PARP1 hyperactivation, and severe NAD<sup>+</sup>/ATP depletion that stimulate Ca<sup>2+</sup>-dependent programmed necrosis, unique to this new class of NQO1 "bioactivated" drugs. Short-term exposure of NQO1<sup>+</sup> cells to deoxynyboquinone was sufficient to trigger cell death, although genetically matched NQO1<sup>-</sup> cells were unaffected. Moreover, siRNA-mediated NQO1 or PARP1 knockdown spared NQO1<sup>+</sup> cells from short-term lethality. Pretreatment of cells with BAPTA-AM (a cytosolic Ca<sup>2+</sup> chelator) or catalase (enzymatic H<sub>2</sub>O<sub>2</sub> scavenger) was sufficient to rescue deoxynyboquinone-induced lethality, as noted with  $\beta$ -lapachone. Investigations *in vivo* showed equivalent antitumor efficacy of deoxynyboquinone to  $\beta$ -lapachone, but at a 6-fold greater potency. PARP1 hyperactivation and dramatic ATP loss were noted in the tumor, but not in the associated normal lung tissue. Our findings offer preclinical proof-of-concept for deoxynyboquinone as a potent chemotherapeutic agent for treatment of a wide spectrum of therapeutically challenging solid tumors, such as pancreatic and lung cancers. *Cancer Res*; 72(12); 3038–47. ©2012 AACR.

### Introduction

Lack of selectivity of most cancer chemotherapeutics remains a major limiting factor (1). We have focused on exploiting elevated NAD(P)H:quinone oxidoreductase-1 (NQO1, EC 1.6.99.2) levels in most solid tumors, particularly in non-small cell lung (NSCLC), prostate, pancreatic, and breast (2–4), for drug development. NQO1 is an inducible phase II detoxifying 2-electron oxidoreductase capable of reducing most quinones, forming stable hydroquinones. Glutathione S-transferase

then detoxifies hydroquinones, conjugating them with glutathione for secretion (5).

Certain rare compounds, however, may undergo NQO1-mediated bioreduction for antitumor activity. Rather than detoxifying, NQO1 converts specific quinones into highly cytotoxic species. Most antitumor quinones dependent on NQO1 are DNA alkylators: mitomycin C (6, 7), RH1 (8), E09 (7), and AZQ (9). Use of these agents is limited because they are subject to detoxification pathways, efficient substrates for ubiquitously expressed one-electron oxidoreductases that cause normal tissue toxicity, and subject to emergent drug resistance from various DNA repair pathways.

$\beta$ -Lapachone (Fig. 1A) kills cancer cells and murine xenograft and orthotopic human or mouse tumor models *in vivo* in an NQO1-dependent manner (3, 10).  $\beta$ -Lapachone induces cell death by NQO1-dependent reactive oxygen species (ROS) formation and oxidative stress (2–4). NQO1 metabolizes  $\beta$ -lapachone into an unstable hydroquinone that spontaneously oxidizes, by 2 dioxygen equivalents, generating superoxide (10, 11). Elevated long-lived hydrogen peroxide (H<sub>2</sub>O<sub>2</sub>) causes extensive DNA base and single-strand break (SSB) lesions that are normally easily and rapidly repaired. However, extensive NQO1-dependent SSBs cause poly(ADP-ribose)polymerase-1 (PARP1) hyperactivation, inhibiting the essential base and SSB repair functions. PARP1 hyperactivation causes dramatic NAD<sup>+</sup>/ATP pool losses due to ADP ribosylation, resulting in extensive energy depletion and cell death (2–4). Thus,

**Authors' Affiliations:** Departments of <sup>1</sup>Pharmacology, <sup>2</sup>Radiation Oncology, and <sup>3</sup>Biochemistry, Simmons Cancer Center, UT Southwestern Medical Center, Dallas, Texas; and <sup>4</sup>Department of Chemistry, Roger Adams Laboratory, University of Illinois at Urbana-Champaign, Urbana, Illinois

**Note:** Supplementary data for this article are available at Cancer Research Online (<http://cancerres.aacrjournals.org/>).

X. Huang and Y. Dong contributed equally to this work.

This article is CSCN 066.

**Corresponding Authors:** Paul J. Hergenrother, Department of Chemistry, Roger Adams Laboratory, University of Illinois at Urbana-Champaign, Urbana, IL 61801. Phone: 217-333-0363; Fax: 217-244-8024; E-mail: hergenro@uiuc.edu; and David A. Boothman, Departments of Pharmacology and Radiation Oncology, Simmons Cancer Center, UT Southwestern Medical Center, Dallas, TX 75390. Phone: 214-645-6371; Fax: 214-645-6347; E-mail: David.Boothman@utsouthwestern.edu

doi: 10.1158/0008-5472.CAN-11-3135

©2012 American Association for Cancer Research.

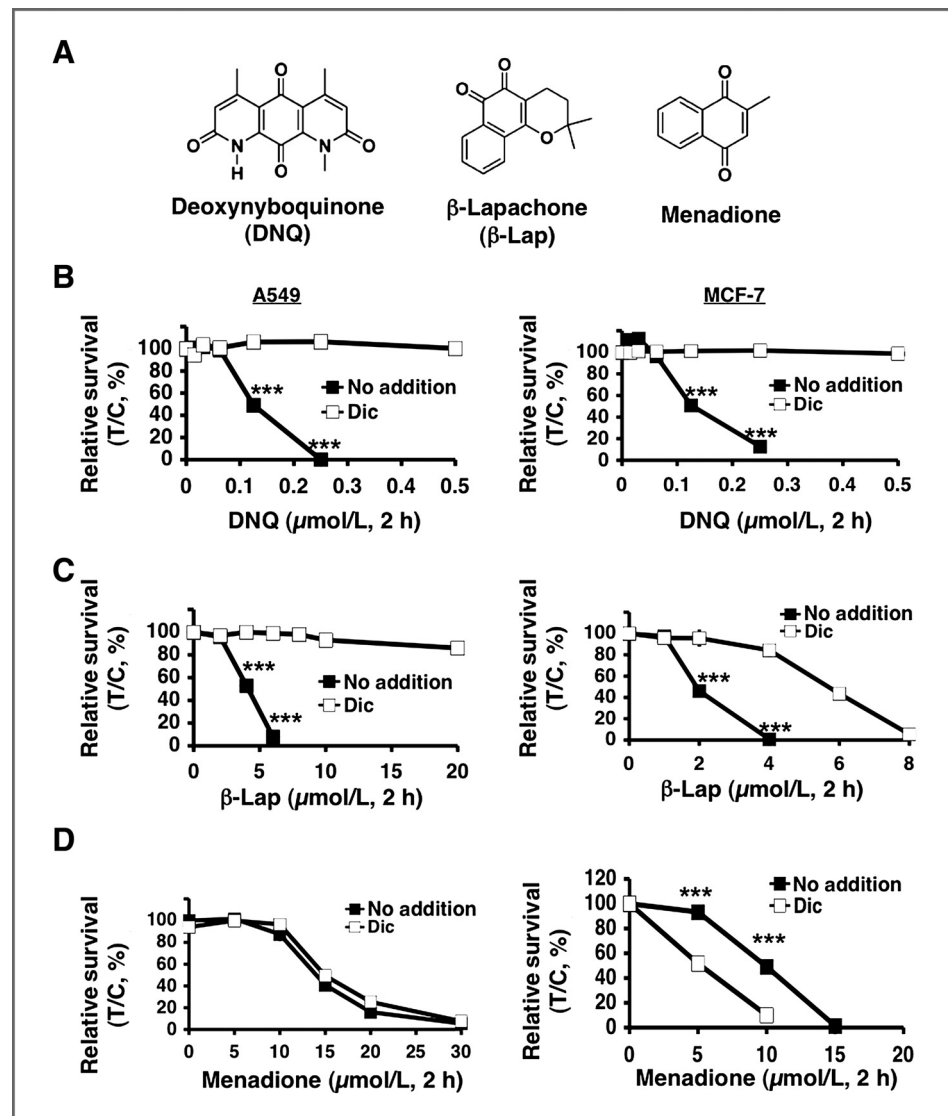

**Figure 1.** Deoxyxyboquinone induced lethality in endogenous NQO1<sup>+</sup> cells. **A**, structures of deoxyxyboquinone,  $\beta$ -lapachone, and menadione. **B**, endogenous, NQO1 overexpressing A549 or MCF-7 cells were treated with or without various deoxyxyboquinone doses ( $\mu$ mol/L, 2 hours),  $\pm$  dicoumarol (40  $\mu$ mol/L, 2 hours). Lethality was monitored by relative survival. Data are means,  $\pm$ SE for sextuplets carried out thrice. **C**, cells from **B** were treated with or without various  $\beta$ -lapachone doses ( $\mu$ mol/L, 2 hours),  $\pm$  dicoumarol. **D**, cells were treated with or without menadione ( $\mu$ mol/L, 2 hours),  $\pm$  dicoumarol as in **B**. Dicoumarol potentiated menadione toxicity in MCF-7, but not in A549, cells. Control cells in **B–D** were treated with identical DMSO concentrations (<0.05%). \*\*\*,  $P < 0.001$ . Dic, dicoumarol; DNQ, deoxyxyboquinone;  $\beta$ -lap,  $\beta$ -lapachone.

$\beta$ -lapachone kills NQO1<sup>+</sup> cancer cells by programmed necrosis that is independent of caspase activation or p53 status, independent of bcl-2 levels, not affected by BAX/BAK deficiencies, independent of EGF receptor, Ras, or other constitutive signal transduction activation, and/or not dependent on proliferation.  $\beta$ -Lapachone is, therefore, an attractive experimental drug, and various  $\beta$ -lapachone formulations have been, or are in, phase I/II clinical trials.

However,  $\beta$ -lapachone has a modest potency (LD<sub>50</sub>: 2–10  $\mu$ mol/L) *in vitro*, with limited aqueous solubility that complicates formulation and delivery. Although nanoparticle strategies for  $\beta$ -lapachone delivery solved formulation issues, resulting in dramatic antitumor efficacy (12), there is a clear need for higher potency drugs.

Deoxyxyboquinone (Fig. 1A) is a promising antineoplastic agent whose mechanism of action has not been elucidated. Deoxyxyboquinone killed cancer cells through oxidative stress and ROS formation (13, 14), and *N*-acetyl cysteine, a global free radical scavenger (13), partially blocked lethality. Here, we

show that deoxyxyboquinone undergoes an NQO1-dependent futile cycle similar to  $\beta$ -lapachone, in which O<sub>2</sub> is consumed, ROS is formed, and extensive DNA damage triggers PARP1 hyperactivation. Dramatic NAD<sup>+</sup>/ATP pool decreases caused programmed necrosis. Deoxyxyboquinone is 20- to 100-fold more potent than  $\beta$ -lapachone, with a significantly enhanced therapeutic window in human breast, prostate, and pancreatic cancer models *in vitro*. NQO1 processes deoxyxyboquinone *in vitro* more efficiently than  $\beta$ -lapachone, suggesting that increased usage accounts for its enhanced potency. Significant efficacy of deoxyxyboquinone at 6-fold greater potency versus  $\beta$ -lapachone against orthotopic Lewis lung carcinoma (LLC) is shown.

## Materials and Methods

### Chemicals, reagents, and antibodies

Deoxyxyboquinone and  $\beta$ -lapachone were synthesized as described (10, 13). Streptonigrin, mitomycin C, menadione, Hoechst 33258, hydrogen peroxide (H<sub>2</sub>O<sub>2</sub>), cytochrome *c*,

propidium iodide, and dicoumarol were purchased from Sigma-Aldrich. All quinones and BAPTA-AM (Calbiochem) were dissolved in dimethyl sulfoxide (DMSO). Dihydroethidium (DHE, 5 mmol/L in DMSO) was purchased from Invitrogen Life Technologies. RH1 and  $\alpha$ -human NQO1 antibody were provided by Dr. David Ross (University of Colorado Health Science Center, Denver, CO) and used at a 1:5,000 dilution overnight, 4°C.  $\alpha$ -PAR (BD Pharmingen), which detects poly (ADP-ribosyl)ated (PAR) proteins (typically ADP-ribosylated PARP1), and  $\alpha$ -PARP1 (sc-8007, Santa Cruz Biotechnology) antibodies were used at 1:4,000 and 1:2,000 dilutions, respectively.  $\alpha$ -Tubulin was monitored for loading (15).

#### NQO1 enzyme assays

Deoxyxyboquinone,  $\beta$ -lapachone, or other quinones (see Supplementary Fig. S1 for structures) were monitored as NQO1 substrates using an NADH (400  $\mu$ mol/L) recycling assay and recombinant NQO1 (Sigma; ref. 10), in which NADH oxidation to NAD<sup>+</sup> was monitored by absorbance ( $A_{340}$  nm) and data recorded at 2 second intervals for 5 minutes. NADH oxidation rates were compared with reactions lacking  $\beta$ -lapachone or deoxyxyboquinone, or containing dicoumarol (10  $\mu$ mol/L). Initial velocities were calculated and data expressed as dicoumarol-inhibited relative units ( $\mu$ mol NADH oxidized/min/ $\mu$ mol protein; ref. 10).

#### O<sub>2</sub> consumption rates

Assays were carried out using Seahorse 24-well dishes in conjunction with an XF24 sensor cartridge and a XF24 Extracellular Flux Analyzer (Seahorse Biosciences) as per the manufacturer's instructions. Briefly, 30,000 cells per well were seeded using a 2-step process, and cells grown as above with unseeded background correction wells. O<sub>2</sub> consumption rates (OCR) and proton production rates were measured using the XF24 Analyzer and Assay Wizard software. Data represent means, %treated/control (T/C,%)  $\pm$ SE from quadruplet assessments.

#### Nucleotide analyses

Changes in intracellular NAD<sup>+</sup> pools were measured using Fluorescent NAD/NADH Detection Kits (Cell Technology, Inc.; ref. 2). NAD<sup>+</sup>/NADH levels were graphed as means,  $\pm$ SE from at least 3 independent experiments carried out in sextuplets each. Changes in ATP *in vivo* were measured as described (2–4) and using a colorimetric/fluorometric assay (BioVision).

#### Immunoblotting, ROS formation

Western blots were carried out as described (3). ROS (super-oxide) formation was monitored by DHE staining and microscopy. Quantitative data were analyzed using NIH ImageJ software, in which data are means,  $\pm$ SE of 100 cells and duplicate experiments conducted in triplicate.

#### PAR formation

PAR formation *in vivo* was assessed by Western blotting controlled for  $\alpha$ -tubulin (2–4). Chemiluminescence ELISA assays, to quantify PAR formation, were carried out by HT PARP *in vivo* Pharmacodynamic II Assays (Trevigen, Inc.).

Untreated or treated cells were incubated with  $\alpha$ -PAR antibody, then with goat  $\alpha$ -rabbit IgG-horseradish peroxidase. Chemiluminescence by PeroxyGlow assays were expressed as means,  $\pm$ SE from 3 independent experiments.

#### TUNEL assays

Terminal deoxynucleotidyl transferase dUTP nick end-labeling (TUNEL) assays were carried out by FC-500 flow cytometry (Beckman Coulter Electronics; ref. 10), and data were means,  $\pm$ SE from 3 independent experiments, carried out in triplicate.

#### Cell lines and culture

Endogenous NQO1 overexpressing human A549 NSCLC, MCF-7 breast, MIA PaCa-2 pancreatic, PC-3 prostate, and HT1080 sarcoma cancer cells were obtained (3, 4, 16), MAP tested and DNA fingerprinted (ATC). NQO1<sup>−</sup>\*2 polymorphic human H596 NSCLC or MDA-MB-231 triple-negative breast, and genetically matched NQO1<sup>+</sup>, cancer cells were generated by us (2, 4). NQO1<sup>+</sup> human PC-3 and genetically matched stable lentiviral short hairpin RNA (shRNA)-NQO1 knockdown, prostate cancer cells were generated by us (16). Cancer cells were grown in DMEM with 5% FBS. MDA-MB-231 cells were grown in RPMI 1640. Cells were cultured at 37°C in a 5% CO<sub>2</sub> 95% air humidified atmosphere and were *Mycoplasma* free.

#### PARP1 siRNA knockdown

siRNA specific to the open reading frame of PARP1, 5'-CCAAAGGAATCCGAGAAA-3' (Thermo Fisher Scientific) was transiently transfected into cancer cells. PARP1 knockdown was confirmed using Western blot assays. Results were confirmed using the ON-TARGETplus PARP1 SMARTpool.

#### Survival

Relative survival assays were assessed as described (3) and correlated well with colony forming assays (15). Results were reported as means,  $\pm$ SE from sextuplet repeats. Experiments were independently repeated 3 times.

#### Hepatocyte metabolic stability and pharmacokinetic assessments

During initial maximum-tolerated dose evaluations for deoxyxyboquinone (10 mg/kg), pharmacokinetics for deoxyxyboquinone was assessed and compared with prior  $\beta$ -lapachone (30 mg/kg) pharmacokinetic data (12) as described in Supplementary Material and Methods. The metabolic stability of deoxyxyboquinone versus  $\beta$ -lapachone was examined in a standard *in vitro* hepatocyte assay (Supplementary Materials and Methods).

#### Deoxyxyboquinone efficacy against orthotopic LLC

**Antitumor efficacy.** LLC cells ( $0.5 \times 10^6$ ) were intravenously injected into the tail veins of female (~22 gm) athymic nude mice. Two days later, randomized groups of mice (5 per group) were treated intravenously with hydroxypropyl- $\beta$ -cyclodextrin (HP $\beta$ CD) vehicle alone, or  $\beta$ -lapachone (30 mg/kg) or deoxyxyboquinone (2.5–10 mg/kg) dissolved in

HP $\beta$ CD (12), every other day for 5 injections; mice treated with HP $\beta$ CD (600 or 1,000 mg/kg for  $\beta$ -lapachone or deoxyxyboquinone, respectively) did not influence tumor growth or survival. Later (18 days posttumor inoculation), mice were euthanized, lungs removed, and average lung wet weights of tumor-bearing minus control nontumor-bearing animals calculated. Lungs were visually examined to confirm LLC nodules. Tumors and associated normal lung tissue were also assessed for PARP1 hyperactivation (PAR formation) and ATP loss. Experiments were carried out twice and average lung wet weights graphed/group.

**Survival.** LLC-bearing mice were treated with HP $\beta$ CD alone,  $\beta$ -Lap-HP $\beta$ CD (30 mg/kg), or DNQ-HP $\beta$ CD (5 mg/kg) as above and monitored for changes in weight and survival, and Kaplan-Meier curves generated. *P* values were reported with asterisks. All animal protocols have Institutional Animal Care and Use Committee approval (#2008-1080, UT Southwestern).

### Statistical analyses

Student *t* tests were used to determine statistical significance from experiments repeated at least 3 independent times. *P* values were reported by asterisks as indicated.

## Results

### Deoxyxyboquinone kills cancer cells in an NQO1-dependent manner

We examined the lethality of deoxyxyboquinone with or without dicoumarol, an NQO1 inhibitor, using 2 cancer cell lines, MCF-7 (breast) and A549 (NSCLC), that endogenously express elevated NQO1 levels (Fig. 1). Deoxyxyboquinone-induced lethality was compared with  $\beta$ -lapachone and menadione (Fig. 1A); dicoumarol prevented  $\beta$ -lapachone, but potentiated menadione lethality in NQO1<sup>+</sup> cells (10, 17). Dicoumarol spared deoxyxyboquinone lethality in both cells (Fig. 1B). However, deoxyxyboquinone was approximately 20-fold more potent than  $\beta$ -lapachone (compare Fig. 1B and C). As with  $\beta$ -lapachone (5  $\mu$ mol/L), a minimum 2-hour exposure of A549 cells to deoxyxyboquinone (0.25  $\mu$ mol/L) was required for complete lethality (Supplementary Fig. S2A) and extensive DNA base damage and SSBs (Supplementary Fig. S2B). This dose was used in all subsequent studies.

Deoxyxyboquinone was processed *in vitro* at a significantly increased rate relative to  $\beta$ -lapachone, or other quinones (streptonigrin, menadione, RH1, and mitomycin C). At 1  $\mu$ mol/L, deoxyxyboquinone was reduced by NQO1 approximately 13-fold more efficiently than other quinones (Supplementary Table S1, Supplementary Fig. S1). Importantly, at LD<sub>100</sub> levels (0.25  $\mu$ mol/L for deoxyxyboquinone, 5  $\mu$ mol/L for  $\beta$ -lapachone) in A549 cells, the NQO1 NADH recycling activities *in vitro* using deoxyxyboquinone or  $\beta$ -lapachone were essentially identical (Supplementary Table S2), suggesting that the catalytic efficiency of NQO1 for deoxyxyboquinone was at least 20-fold greater than for  $\beta$ -lapachone. Menadione was a significantly (>20-fold) less efficient substrate *in vitro* for NQO1 at its LD<sub>90</sub>, as reported (10). Dicoumarol potentiated menadione lethality in MCF-7 cells, but not in A549 cells (Fig. 1D).

### Deoxyxyboquinone efficiently kills a wide spectrum of cancer cells in an NQO1-dependent manner

Deoxyxyboquinone efficiently killed human MIA PaCa-2 pancreatic (Fig. 2A) and HT1080 sarcoma cancer cells (Fig. 2B) with LD<sub>50</sub> values of 48 and 178 nmol/L, respectively; deoxyxyboquinone showed greater potency in pancreatic cells, in general. Dicoumarol protected both cells. We then treated genetically matched NQO1<sup>+</sup> versus NQO1<sup>-</sup> human H596 NSCLC or MDA-MB-231 breast cancer cells with deoxyxyboquinone; \*2 NQO1<sup>-</sup> polymorphic H596 and MDA-MB-231 cells were separately corrected for NQO1 expression as clones or pooled populations (4, 10). Deoxyxyboquinone killed all NQO1<sup>+</sup> clones and pooled populations, but not genetically matched NQO1<sup>-</sup> cells (Fig. 2C and D). Similarly, human PC-3 cells stably knocked down for NQO1 expression (shNQ) were spared versus NQO1<sup>+</sup> PC-3 cells expressing nonsilencing shRNA (Fig. 2E). Deoxyxyboquinone-induced cytotoxicity in nonsilenced NQO1<sup>+</sup> PC-3 cells was prevented by dicoumarol (Fig. 2E), as in parental PC-3 cells. PC-3 cells treated with dicoumarol were similarly spared from deoxyxyboquinone lethality as were stable NQO1 knockdown shNQ PC-3 cells (Fig. 2E). Colony forming assays confirmed the NQO1 dependency of deoxyxyboquinone (Fig. 2F). LD<sub>50</sub> values for deoxyxyboquinone versus  $\beta$ -lapachone cytotoxicities in various cancers are listed in Supplementary Table S3, highlighting the NQO1-dependent potency of deoxyxyboquinone.

### Deoxyxyboquinone NQO1-dependent lethality involves a futile cycle generating ROS

$\beta$ -Lapachone-induced lethality involves a futile cycle mediated by NQO1, in which approximately 60 moles of NAD(P)H are used, forming approximately 120 moles superoxide (O<sub>2</sub><sup>-</sup>) per mole  $\beta$ -lapachone in 2 minutes (10). We compared OCR in A549 NSCLC cells after deoxyxyboquinone versus  $\beta$ -lapachone treatments. As with  $\beta$ -lapachone (Fig. 3A), deoxyxyboquinone-treated A549 cells (Fig. 3B) showed dramatic OCR increases that were dose dependent and reached peak levels in 30 minutes at LD<sub>50</sub> levels (Fig. 3C and D). Minimal differences between  $\beta$ -lapachone and deoxyxyboquinone were noted, except that significantly lower deoxyxyboquinone doses were needed (Fig. 3B). Dicoumarol blocked OCR from either deoxyxyboquinone- or  $\beta$ -lapachone-treated cells, strongly suggesting that O<sub>2</sub> consumption was NQO1 mediated. Similar OCR increases were noted in NQO1<sup>+</sup>, but not in NQO1<sup>-</sup>, H596 cells (Supplementary Fig. 3A and B). Low, but detectable, O<sub>2</sub> consumption in NQO1<sup>+</sup> A549 cells after cotreatment of  $\beta$ -lapachone and dicoumarol (Fig. 3A and C) may be due to one-electron oxidoreductases (b5R and p450R) metabolizing  $\beta$ -lapachone. Interestingly, such OCRs with dicoumarol were not noted with deoxyxyboquinone, suggesting that deoxyxyboquinone was not as good a substrate for one-electron oxidoreductases (Fig. 3B and D).

We then monitored superoxide (O<sub>2</sub><sup>-</sup>) formation using DHE staining. Deoxyxyboquinone (0.25  $\mu$ mol/L) induced dramatic ROS formation in 60 minutes in A549 cells that was prevented by dicoumarol (Fig. 3E). Exogenous catalase (CAT, 1,000 U) partially rescued deoxyxyboquinone cytotoxicity (Fig. 3F). Thus, NQO1-dependent deoxyxyboquinone metabolism

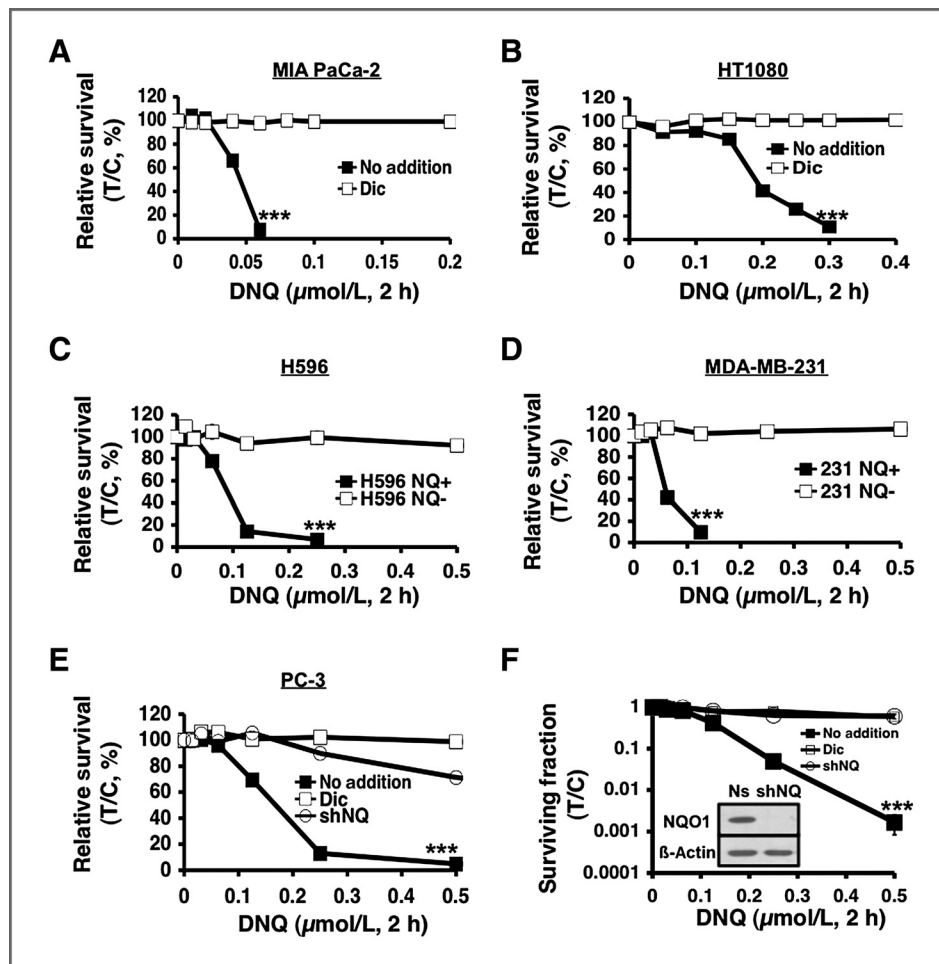

**Figure 2.** NQO1-dependent, deoxyxyboquinone-induced lethality in various cancer cells. Deoxyxyboquinone killed human MIA PaCa-2 pancreatic (A) and HT1080 sarcoma (B) cells with lethal doses of 6 and 300 nmol/L, respectively, and dicoumarol rescued lethality. NQO1<sup>-</sup> H596 NSCLC (C) or MDA-MB-231 breast cancer (D) cells were resistant to deoxyxyboquinone. Exogenous overexpression of NQO1 enhanced deoxyxyboquinone lethality. E, human PC-3 prostate cancer cells knocked down for NQO1 expression using shRNA-NQO1 (shNQ) were resistant to deoxyxyboquinone (μmol/L, 2 hours). PC-3 cells containing nonsilencing shRNA (no addition) were sensitive to deoxyxyboquinone, whereas dicoumarol suppressed lethality similar to shNQ PC-3 cells. F, clonogenic assays confirmed deoxyxyboquinone lethality in NQO1<sup>+</sup> shRNA-nonsilenced Ns PC-3 cells, whereas resistance was noted in shNQ PC-3 cells, or in Ns PC-3 cells + dicoumarol. All treatments were as in E. No addition, DMSO alone as in Fig. 1. Inset, Western blot shows NQO1 knockdown, with 26 ± 10 units (Supplementary Table S1). \*\*\*,  $P \leq 0.001$ . Dic, dicoumarol; DNQ, deoxyxyboquinone.

resulted in extensive OCR,  $O_2^-$  formation, and long-lived  $H_2O_2$  production similar to  $\beta$ -lapachone (2), but at 20-fold lower concentrations.

#### Deoxyxyboquinone induces PARP1 hyperactivation, loss of essential nucleotides

Deoxyxyboquinone-treated A549 cells were examined for poly(ADP-ribosyl)ated protein (PAR) formation using an ELISA method, in which peak levels were noted at approximately 10 minutes (Fig. 4A). PAR-PARP1 (PAR) formation was confirmed by Western blot analyses with similar kinetics, lasting approximately 20 minutes (Fig. 4B). Dicoumarol effectively suppressed PAR formation and blocked PARP1 hyperactivation in deoxyxyboquinone-treated A549 cells (Fig. 4A). PARP1 hyperactivation induced by deoxyxyboquinone in A549 cells was accompanied by dramatic  $NAD^+$  and ATP losses. Both dose–response and time–course studies showed that  $NAD^+$  and ATP were rapidly and extensively depleted (Figs. 4C–F), and a 2-hour exposure was sufficient for near complete  $NAD^+$  loss in deoxyxyboquinone-exposed cells (0.25 μmol/L, 2 hours, Fig. 4C and E). Dramatic ATP loss followed  $NAD^+$  depletion in both dose- and time-dependent manners (Fig. 4D and F) that were prevented by dicoumarol. Deoxyxyboquinone-induced ATP losses occurred in an NQO1-depen-

dent manner in NQO1<sup>+</sup>, but not in NQO1<sup>-</sup>, H596 cells (Supplementary Fig. 4A and B).

#### Both PARP1 and $Ca^{2+}$ play pivotal roles in deoxyxyboquinone-induced cell death

We then transiently knocked down PARP1 using specific siRNA, which did not affect NQO1 expression (Fig. 5A). PARP1 knockdown significantly prevented  $NAD^+$  (Fig. 5B) and ATP losses (Supplementary Fig. S5) in deoxyxyboquinone-exposed A549 cells versus parental or nontargeting siRNA-treated (siNT) cells. Transient PARP1 knockdown significantly decreased programmed necrosis (TUNEL<sup>+</sup>) 24 hours after treatment with either LD<sub>50</sub> (0.125 μmol/L) or lethal (0.25 μmol/L) deoxyxyboquinone doses (Fig. 5C and D), similar to effects noted with  $\beta$ -lapachone (2). Dicoumarol spared parental and PARP1 knockdown cells (Fig. 5D).

PARP1 hyperactivation required endoplasmic reticulum  $Ca^{2+}$  release as BAPTA-AM, an endogenous cytosolic  $Ca^{2+}$  chelator, spared  $\beta$ -lapachone-induced lethality (2). BAPTA-AM pretreatment significantly spared deoxyxyboquinone-induced lethality in NQO1<sup>+</sup> A549 or H596 NSCLC cells using long-term survival assays (Fig. 5E, Supplementary Fig. S6), and significantly suppressed PARP1 hyperactivation, noted by abrogation of  $NAD^+$  depletion (no addition vs. BAPTA-AM, Fig. 5F).

**Figure 3.** Elevated ROS in deoxyxyboquinone-treated endogenous NQO1<sup>+</sup> cancer cells. A, OCR in A549 cells treated with or without  $\beta$ -lapachone  $\pm$  dicoumarol (40  $\mu$ mol/L) were monitored at 8-minute intervals for 2 hours. Data were means,  $\pm$ SE normalized to untreated controls. Experiments were done 3 times in quadruplet. B, OCRs were measured after deoxyxyboquinone treatment. Experiments were carried out as in A. Quantitative data of total OCR 30 minutes after  $\beta$ -lapachone (C) or deoxyxyboquinone (D) treatments at different doses. Data from A and B were used. E, A549 cells were treated with or without deoxyxyboquinone (0.25  $\mu$ mol/L)  $\pm$  dicoumarol (40  $\mu$ mol/L). ROS formation was assessed by DHE staining. Results are means,  $\pm$ SE of arbitrary units (13) measured by staining intensity from  $\geq 100$  cells using NIH Image J. F, deoxyxyboquinone ( $\mu$ mol/L, 2 hours)-exposed A549 cells were cotreated with  $\pm$  catalase (CAT, 1,000 U) and clonogenic survival monitored. \*\*\*,  $P \leq 0.001$ , comparing deoxyxyboquinone treated A549 cells  $\pm$  catalase cotreatment. Dic, dicoumarol; DNQ, deoxyxyboquinone;  $\beta$ -lap,  $\beta$ -lapachone.

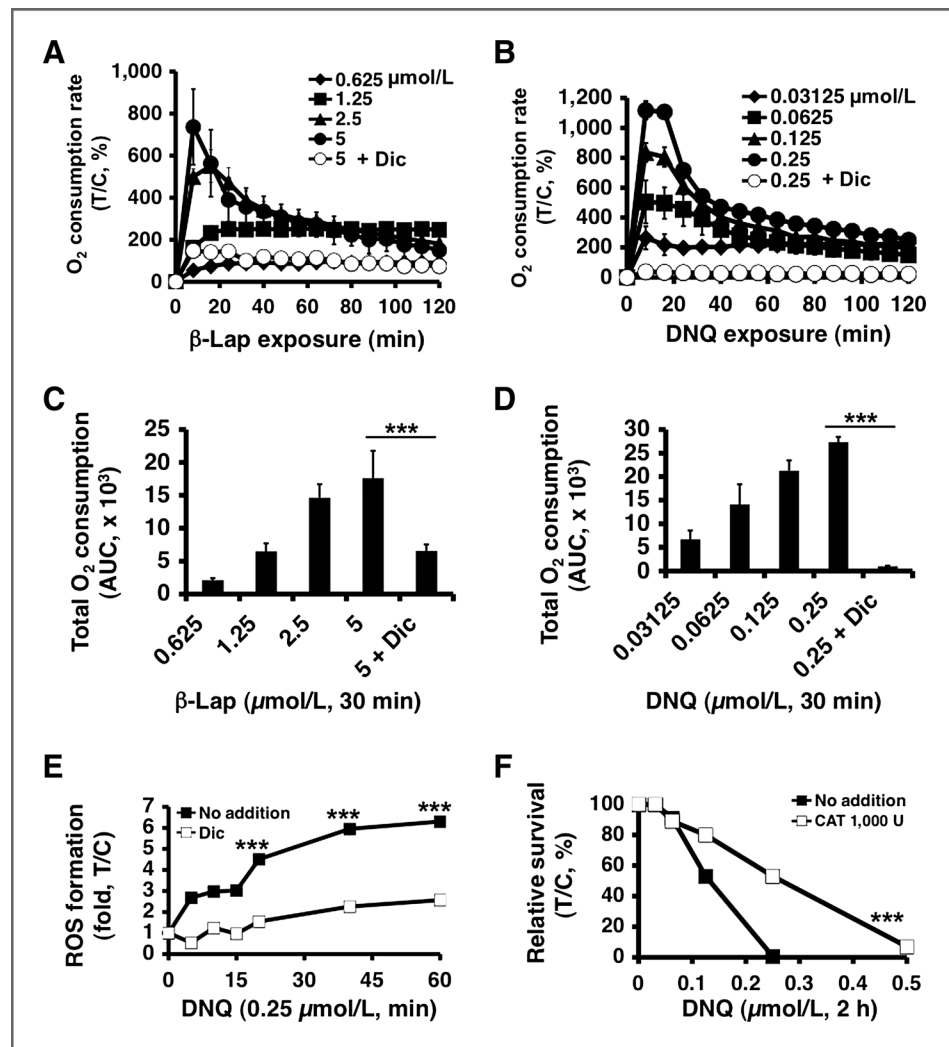

### Potential NQO1-dependent therapeutic window of deoxyxyboquinone

Differential NQO1 expression in various solid tumors versus normal tissue can be effectively exploited using  $\beta$ -lapachone, resulting in a wide therapeutic window *in vitro* (4) that predicted its antitumor efficacy *in vivo* (3, 16). A549 cells were exposed to various deoxyxyboquinone doses, with or without dicoumarol (40  $\mu$ mol/L), at various times to assess the long-term survival "potential therapeutic window," as done with  $\beta$ -lapachone in NSCLC, pancreatic, and prostate cancers (3, 12, 16). In A549 cells, deoxyxyboquinone exhibited a much broader therapeutic window than  $\beta$ -lapachone (compare Figs. 6A–J to those in ref. 4). Deoxyxyboquinone-treated (0.25  $\mu$ mol/L) A549 cells were rescued by dicoumarol (Fig. 6A–H). However, as the length of deoxyxyboquinone exposure was increased to more than 24 hours, only approximately 70% of the cells were spared by dicoumarol (Fig. 6I). Lethality was further increased after more than 48 hours of deoxyxyboquinone exposure in cells treated with dicoumarol (Fig. 6J), with limited lethality increases in parental NQO1<sup>+</sup> cells (compare solid square lines at 2 vs. 24 hours, Fig. 6C and H,

respectively). Similar responses were noted in NQO1<sup>+</sup> vs. NQO1<sup>-</sup> H596 cells (Supplementary Fig. S7A–C).

### Deoxyxyboquinone antitumor efficacy

Using an extremely aggressive orthotopic LLC model in athymic mice, we examined the antitumor efficacy of deoxyxyboquinone (Fig. 7); murine LLC tumors have approximately 80 U of NQO1 activity versus less than 100 U in mouse normal lungs. Mice were treated every other day for 5 injections with HP $\beta$ CD alone, deoxyxyboquinone (2.5, 5, and 10 mg/kg) or  $\beta$ -lapachone (30 mg/kg). Later (18 days), lungs were removed, weighed, and visually scored for tumor nodules (Fig. 7A and B). DNQ-HP $\beta$ CD (5 and 10 mg/kg) or  $\beta$ -Lap-HP $\beta$ CD-treated mice showed significant tumor growth reductions, confirmed by decreases in tumor nodule formation and histology (Fig. 7A and B). No long-term pathologic effects (monitored 18 days after one regimen) of deoxyxyboquinone or  $\beta$ -lapachone were noted in liver (Fig. 7C), lung, bone marrow, spleen, or thymus; unlike humans, mice have relatively high liver NQO1 levels. Overall survival confirmed significant antitumor efficacy of deoxyxyboquinone (at 5 mg/kg;  $P \leq 0.04$ ), at a 6-fold lower dose

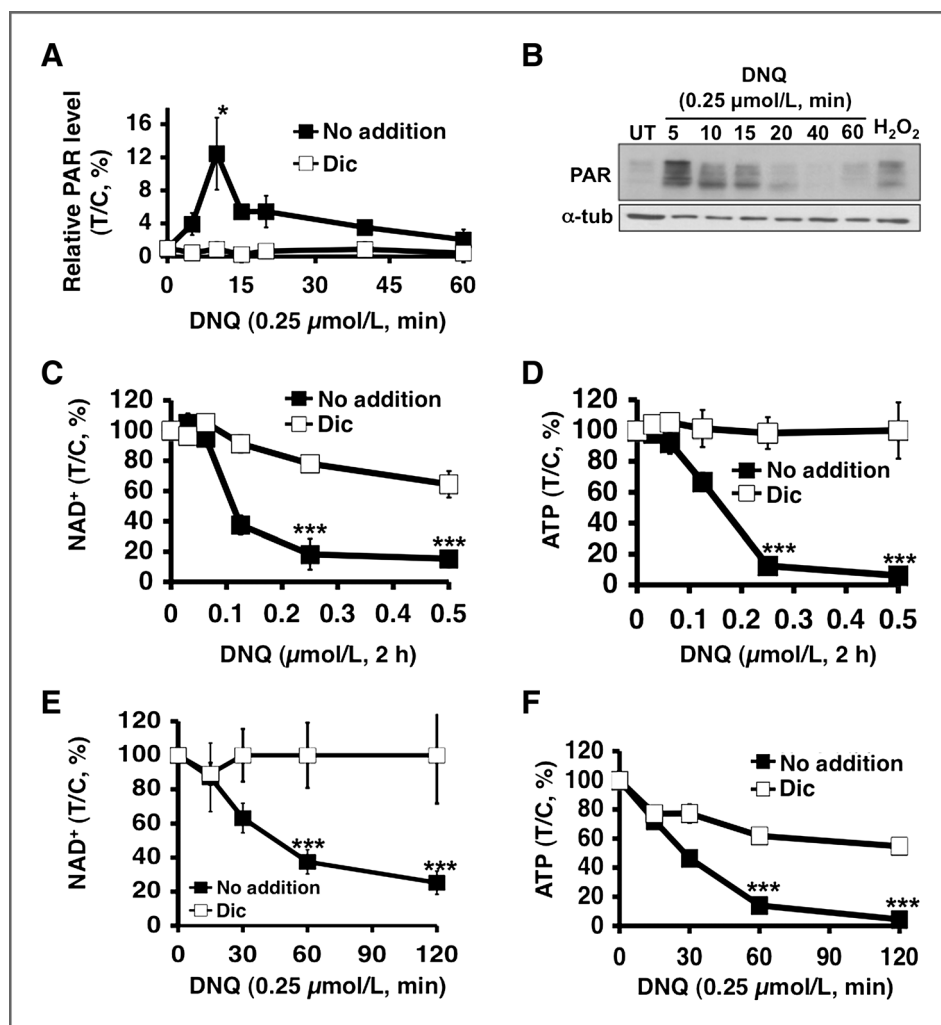

**Figure 4.** Deoxyxyboquinone induces NQO1-dependent PARP1 hyperactivation and nucleotide depletion. **A**, PARP1 hyperactivation, monitored by poly (ADP)-ribosylated protein (PAR) formation using an ELISA method, was detected in A549 cells treated with or without deoxyxyboquinone,  $\pm$  dicoumarol (40  $\mu$ mol/L). Data are means,  $\pm$ SE from 3 independent experiments. **B**, Western blot assays confirmed PAR formation (PAR-PARP1,  $\sim$ 120 kDa) in A549 cells treated with or without 0.25  $\mu$ mol/L deoxyxyboquinone at indicated times (minutes). Cells were treated with  $H_2O_2$  (1 mmol/L, 15 minutes) as a positive control for PAR formation (PAR). Loading was controlled by  $\alpha$ -tubulin levels. Dose-dependent  $NAD^+$  (C) and ATP (D) loss in A549 cells after various deoxyxyboquinone doses  $\pm$  dicoumarol (40  $\mu$ mol/L).  $NAD^+$  (E) and ATP (F) depletion was analyzed at indicated times, with or without deoxyxyboquinone (0.25  $\mu$ mol/L)  $\pm$  dicoumarol (40  $\mu$ mol/L). Data are means,  $\pm$ SE from 3 independent experiments, in triplicate. \*,  $P \leq 0.05$ ; \*\*\*,  $P \leq 0.001$ . DNQ, deoxyxyboquinone;  $\alpha$ -tub,  $\alpha$ -tubulin.

than  $\beta$ -lapachone (30 mg/kg; Fig. 7D). Finally, PAR formation and energy (ATP) losses in LLC tumors after deoxyxyboquinone or  $\beta$ -lapachone exposures confirmed their PARP1 hyperactivation-mediated programmed necrotic mechanism (Fig. 7E and F); tumor-specific ATP losses were confirmed by LC/MS/MS analyses. In contrast, associated normal lung tissue was unaffected, showing no PARP1 hyperactivation or ATP loss (Fig. 7E and F).

Metabolic stability measurements using murine hepatocytes and plasma pharmacokinetic analyses revealed greater metabolic stability and prolonged plasma half-life of deoxyxyboquinone versus  $\beta$ -lapachone (Supplementary Fig. S8A and B and Supplementary Table S4).

## Discussion

Identifying exploitable differences between cancerous and healthy tissue is critical for development of next-generation cancer treatments. NQO1 is overexpressed in a majority of solid tumors, in angiogenic and bone marrow endothelial cells (18, 19), and is induced by exposure to certain quinones (20) or ionizing radiation (21, 22). NQO1 overexpression in solid tumor

versus associated normal tissue was reported in approximately 80% NSCLC tumors at 20- to 40-fold (4), approximately 70% breast tumors at 10- to 20-fold (23), approximately 90% pancreatic tumors at 20- to 30-fold (24), approximately 60% prostate tumors at 10- to 20-fold (3), and approximately 60% colon tumors at 5- to 10-fold (25). Thus, compounds "bioactivated" by NQO1 have potential for "personalized" anti-cancer therapy.

$\beta$ -Lapachone and deoxyxyboquinone kill cancer cells through the same NQO1-dependent programmed necrotic (necroptosis) pathway. At minimally lethal doses of each agent (0.25  $\mu$ mol/L for deoxyxyboquinone, 5  $\mu$ mol/L for  $\beta$ -lapachone), a minimum exposure time (2 hours) was noted for 100% lethality *in vitro*;  $H_2O_2$  was the apparent obligatory ROS intermediate required for PARP1 hyperactivation and lethality, as catalase prevented both;  $Ca^{2+}$  release (2, 26) for PARP1 hyperactivation and lethality was required, as BAPTA-AM prevented both; PARP1 hyperactivation caused dramatic ATP and  $NAD^+$  losses; and cells were killed in the same time frame and with unique proteolysis (e.g., atypical PARP1 and p53 cleavage). Understanding this mechanism will lead to further improvement in their efficacy.

The potency and NQO1-dependent therapeutic window (Fig. 6) of deoxyxyquinone and its apparent reduced metabolism by one-electron oxidoreductases, make this drug (or derivatives) very promising. We elucidated its mechanism of action in various cancer cells, showing that it induced programmed necrosis identical to  $\beta$ -lapachone, but with approximately 20-fold increased potency. NQO1<sup>+</sup> cells were selectively hypersensitive to deoxyxyquinone, whereas genetically matched NQO1<sup>-</sup> cells were resistant. NQO1<sup>+</sup> cells were rescued from deoxyxyquinone-induced cytotoxicity by NQO1 knockdown or by chemical inhibition (via DIC) of NQO1. Exposure of NQO1<sup>+</sup> cancer cells to deoxyxyquinone elicited elevated superoxide levels, with concomitant and significant OCR. Downstream, deoxyxyquinone stimulated PARP1

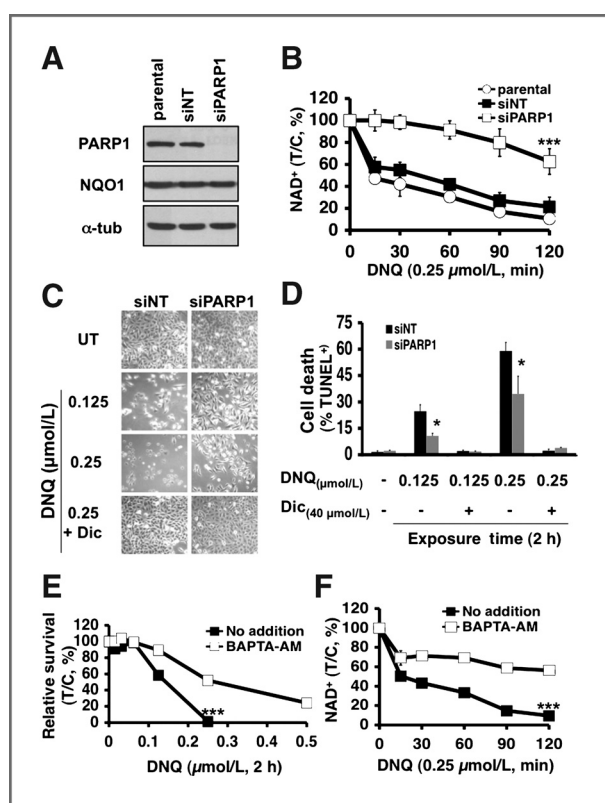

**Figure 5.** PARP1 and Ca<sup>2+</sup> play pivotal roles in deoxyxyquinone-induced lethality. A, steady-state PARP1, NQO1, and  $\alpha$ -tubulin levels were assessed by Western blots in mock-transfected, transiently PARP1 knockdown (siPARP1) or nontargeted siRNA (siNT) cells 48 hours posttransfection. Loading was monitored by  $\alpha$ -tubulin levels. B, PARP1 is essential for NAD<sup>+</sup> loss at the indicated times (minutes) in deoxyxyquinone-treated (0.25  $\mu$ mol/L) NQO1<sup>+</sup> A549 cells. *P* values compare NAD<sup>+</sup> levels in PARP1 knockdown versus parental or siNT A549 cells. C, micrographs of deoxyxyquinone-treated nontargeted (siNT) or PARP1-specific (siPARP1) siRNA knockdown A549 cells at 24 hours posttreatment with LD<sub>50</sub> or lethal doses,  $\pm$  dicoumarol (40  $\mu$ mol/L). D, PARP1 knockdown significantly protected A549 cells from deoxyxyquinone-induced programmed necrosis (%TUNEL<sup>+</sup> cells). Treatment conditions were as in C. Data are means,  $\pm$ SE from 3 independent experiments. E, long-term survival of A549 cells pretreated or not with BAPTA-AM (5  $\mu$ mol/L, 60 minutes), with or without a 2-hour deoxyxyquinone pulse. F, BAPTA-AM pretreatment of deoxyxyquinone-exposed A549 cells prevented NAD<sup>+</sup> loss. \*, *P* < 0.05; \*\*\*, *P* < 0.001. DNQ, deoxyxyquinone;  $\alpha$ -tub,  $\alpha$ -tubulin.

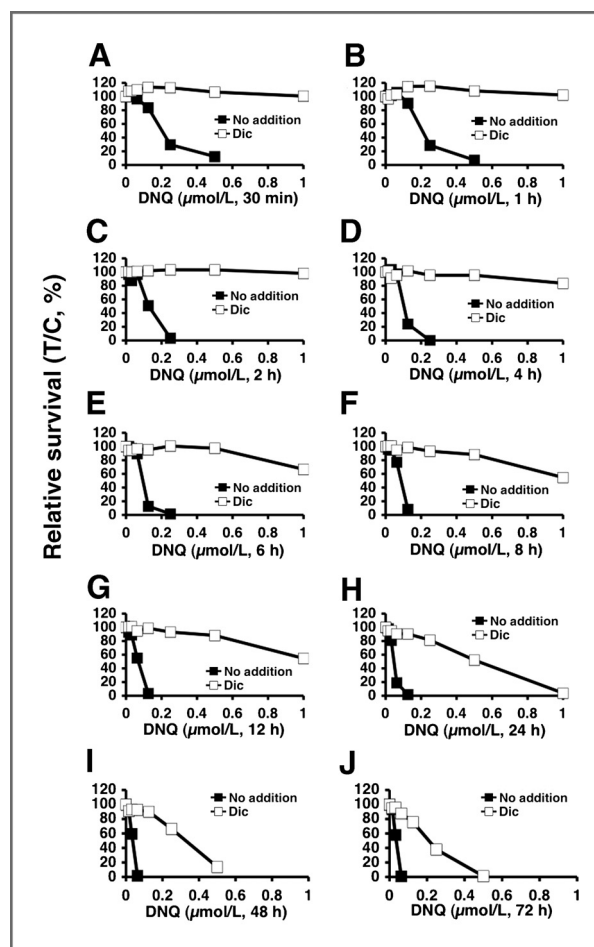

**Figure 6.** Deoxyxyquinone shows a broad NQO1-dependent therapeutic window. Relative survival was monitored in A549 cells treated with various deoxyxyquinone concentrations ( $\mu$ mol/L)  $\pm$  dicoumarol (40  $\mu$ mol/L) for 30 minutes (A), 1 hour (B), 2 hours (C), 4 hours (D), 6 hours (E), 8 hours (F), 12 hours (G), 24 hours (H), 48 hours (I), and 72 hours (J). Graphed are means,  $\pm$ SE of duplicate experiments, repeated in sextuplets. DNQ, deoxyxyquinone.

hyperactivation in a mechanism essentially identical to  $\beta$ -lapachone, which correlated well with NAD<sup>+</sup>/ATP losses, and NADH recycling assays confirmed futile cycling of deoxyxyquinone by NQO1.

Deoxyxyquinone has an apparently broader NQO1-dependent therapeutic window *in vitro* (Fig. 6) than  $\beta$ -lapachone (4) using A549 cells as a surrogate. Similar data were obtained using NQO1<sup>+</sup> versus NQO1<sup>-</sup> H596 cells (Supplementary Fig. S7). Thus, deoxyxyquinone may not be as good a substrate as  $\beta$ -lapachone for p450R and b5R, as  $\beta$ -lapachone-treated cells consumed low, but detectable O<sub>2</sub> even with DIC, whereas OCR was blocked in deoxyxyquinone-treated cells (Figs. 3C and D). Antitumor (Fig. 7), pharmacokinetic and metabolic stability (Supplementary Material, Table S4 and Supplementary Fig. S8A and B) data support a strong antitumor efficacy potential for deoxyxyquinone, with increased metabolic stability in intact hepatocytes *in vitro* and a longer half-life than  $\beta$ -lapachone. The increased metabolic stability of deoxyxyquinone



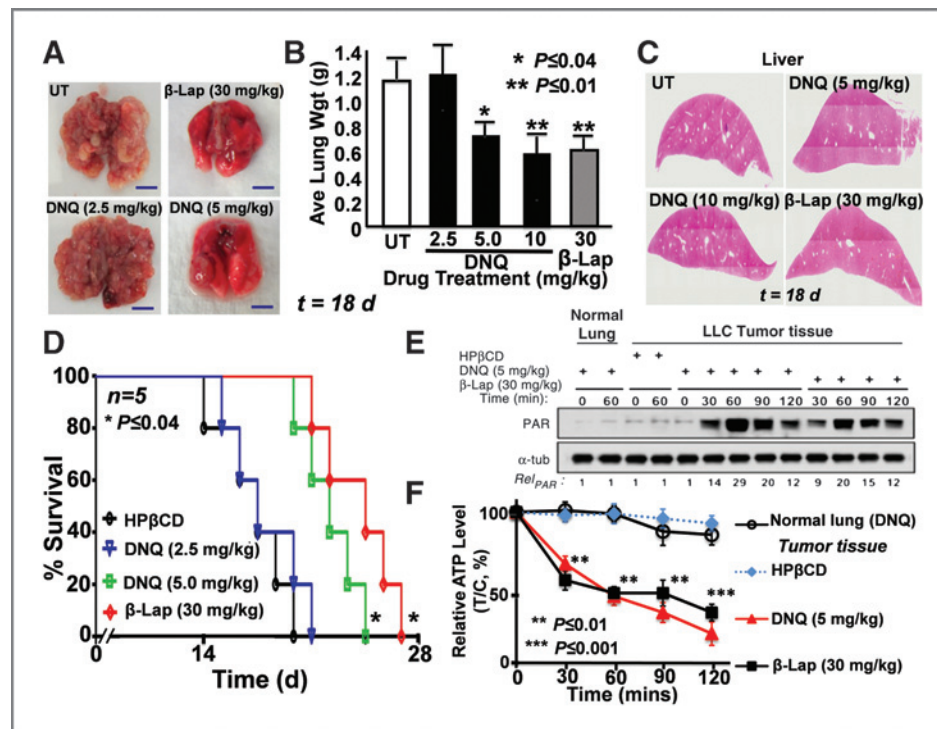

**Figure 7.** Deoxyxyboquinone shows equivalent efficacy to  $\beta$ -lapachone at a 6-fold lower dose. In A–C, mice bearing visible tumors were treated once every other day for 5 injections as in the text, and average wet weight tumor volumes assessed (A and B). Tumor nodules were confirmed visually (A) and histologically (not shown), and average wet weights calculated (B). DNQ-HP $\beta$ CD (5 or 10 mg/kg) or  $\beta$ -Lap-HP $\beta$ CD (30 mg/kg) caused tumor weight decreases that were equivalent ( $P > 0.6$ ). Normal tissues were assessed with no long-term pathologic injury noted; see H&E-stained livers (C). D, Kaplan-Meier survival curves showed significant ( $P \leq 0.04$ ) survival advantages of deoxyxyboquinone (5 mg/kg) or  $\beta$ -lapachone-treated (30 mg/kg) groups. Groups were HP $\beta$ CD alone (1,000 mg/kg), deoxyxyboquinone (2.5, 5.0 mg/kg), or  $\beta$ -lapachone (30 mg/kg) in HP $\beta$ CD. \*,  $P \leq 0.04$ ; \*\*,  $P \leq 0.01$ . In E and F, PAR formation and ATP loss confirmed programmed necrotic mechanism of deoxyxyboquinone- or  $\beta$ -lapachone-treated LLC tumors where animals were treated as in A–C with 3 doses and 24 hours later lungs were removed. Note the lack of response of associated normal lung tissue. \*\*,  $P < 0.01$ ; \*\*\*,  $P < 0.001$ ;  $\alpha$ -tub,  $\alpha$ -tubulin; and PAR, PAR-PARP1. DNQ, deoxyxyboquinone;  $\beta$ -lap,  $\beta$ -lapachone.

is consistent with a lower affinity for one-electron oxidoreductases (i.e., b5R and P450R), as these enzymes are elevated in mouse liver. Deoxyxyboquinone showed equivalent antitumor activity, suppressed tumor growth, and increased survival of tumor-bearing mice as  $\beta$ -lapachone, but at 6-fold lower doses (Fig. 7), consistent with its therapeutic window *in vitro* (Fig. 6). However, our studies *in vivo* are in no way an optimization of deoxyxyboquinone delivery. Significant dose-limiting methemoglobinemia was noted in deoxyxyboquinone-treated mice, and much less with  $\beta$ -lapachone (12). Such blood-borne toxicity can be easily resolved, however, as methemoglobinemia was completely prevented using  $\beta$ -lapachone "stealth" micellar delivery (12). In addition, novel deoxyxyboquinone analogs that we believe will avoid such limiting toxicities are currently being tested using orthotopic breast, lung, prostate, and pancreatic tumor models.

Our comparison of deoxyxyboquinone to various quinones as NQO1 substrates *in vitro* using NADH reutilization assays (10) may explain its increased potency. At 1  $\mu$ mol/L, NQO1 processed deoxyxyboquinone approximately 13-fold more efficiently than  $\beta$ -lapachone ( $1,400 \pm 80$  vs.  $110 \pm 20$  relative units, Supplementary Table S1). At equitoxic ( $LD_{100}$ ) levels, similar NQO1 enzymatic activities ( $680 \pm 110$  vs.  $530 \pm 60$

relative units for 5  $\mu$ mol/L  $\beta$ -lapachone vs. 0.25  $\mu$ mol/L deoxyxyboquinone, respectively, Supplementary Table S2) were noted. The potential therapeutic window of deoxyxyboquinone seems superior to  $\beta$ -lapachone, making deoxyxyboquinone a potentially safer candidate for use as a chemotherapeutic drug, although increased potency may translate into greater normal tissue toxicity. Thus, our studies strongly suggest that deoxyxyboquinone and future more soluble derivatives and/or stealth polymeric nanoparticles will be very promising anticancer therapeutics for the treatment of NSCLC, pancreatic, and breast cancers.

#### Disclosure of Potential Conflicts of Interest

P.J. Hergenrother, J. Gao, and D.A. Boothman are consultants for StemPAR Sciences, Inc., which licensed patents from UT Southwestern and University of Illinois at Urbana-Champaign. No potential conflicts of interest were disclosed by the other authors.

#### Authors' Contributions

**Conception and design:** X. Huang, Y. Dong, E.A. Bey, P.J. Hergenrother, D.A. Boothman

**Development of methodology:** X. Huang, Y. Dong, E.A. Bey, M. Patel, Y. Wang, J. Gao, P.J. Hergenrother, D.A. Boothman

**Acquisition of data (provided animals, acquired and managed patients, provided facilities, etc.):** X. Huang, Y. Dong, J.A. Kilgore, L.-S. Li, E.L. Parkinson, Y. Wang, D.A. Boothman

**Analysis and interpretation of data (e.g., statistical analysis, biostatistics, computational analysis):** X. Huang, Y. Dong, E.A. Bey, J.A. Kilgore, J.S. Bair, L.-S. Li, M. Patel, E. Parkinson, Y. Wang, N.S. Williams, P.J. Hergenrother, D.A. Boothman  
**Writing, review, and/or revision of the manuscript:** X. Huang, Y. Dong, E.A. Bey, J.A. Kilgore, J.S. Bair, L.-S. Li, E.I. Parkinson, N.S. Williams, P.J. Hergenrother, D.A. Boothman  
**Administrative, technical, or material support (i.e., reporting or organizing data, constructing databases):** X. Huang, Y. Dong, L.-S. Li, M. Patel, E.I. Parkinson, P.J. Hergenrother, D.A. Boothman  
**Study supervision:** L.-S. Li, N.S. Williams, P.J. Hergenrother, D.A. Boothman

### Acknowledgments

The authors thank Dr. William G. Bornmann (MD Anderson) for supplying  $\beta$ -lapachone and the Imaging and Chemistry and Cancer Shared Resources, SCC.

### Grant Support

This work was supported by NIH/NCI grant CA102792 to D.A. Boothman and separate support from the University of Illinois. This work was also supported by an AACR Innovator Award, PanCan Block Foundation grant to D.A. Boothman.

The costs of publication of this article were defrayed in part by the payment of page charges. This article must therefore be hereby marked *advertisement* in accordance with 18 U.S.C. Section 1734 solely to indicate this fact.

Received September 21, 2011; revised April 13, 2012; accepted April 16, 2012; published OnlineFirst April 24, 2012.

### References

- Pavet V, Portal MM, Moulin JC, Herbrecht R, Gronemeyer H. Towards novel paradigms for cancer therapy. *Oncogene* 2011;30:1–20.
- Bentle MS, Reinicke KE, Bey EA, Spitz DR, Boothman DA. Calcium-dependent modulation of poly(ADP-ribose) polymerase-1 alters cellular metabolism and DNA repair. *J Biol Chem* 2006;281:33684–96.
- Dong Y, Bey EA, Li LS, Kabbani W, Yan J, Xie XJ, et al. Prostate cancer radiosensitization through poly(ADP-Ribose) polymerase-1 hyperactivation. *Cancer Res* 2010;70:8088–96.
- Bey EA, Bentle MS, Reinicke KE, Dong Y, Yang CR, Girard L, et al. An NQO1- and PARP1-mediated cell death pathway induced in non-small-cell lung cancer cells by beta-lapachone. *Proc Natl Acad Sci U S A* 2007;104:11832–7.
- Ross D, Siegel D. NAD(P)H:quinone oxidoreductase 1 (NQO1, DT-diaphorase), functions and pharmacogenetics. *Methods Enzymol* 2004;382:115–44.
- Danson S, Ward TH, Butler J, Ranson M. DT-diaphorase: a target for new anticancer drugs. *Cancer Treat Rev* 2004;30:437–49.
- McKeown SR, Cowen RL, Williams KJ. Bioreductive drugs: from concept to clinic. *Clin Oncol (R Coll Radiol)* 2007;19:427–42.
- Winski SL, Hargreaves RH, Butler J, Ross D. A new screening system for NAD(P)H:quinone oxidoreductase (NQO1)-directed antitumor quinones: identification of a new aziridinylbenzoquinone, RH1, as a NQO1-directed antitumor agent. *Clin Cancer Res* 1998;4:3083–8.
- Curt GA, Kelley JA, Kufra CV, Smith BH, Kornblith PL, Young RC, et al. Phase II and pharmacokinetic study of aziridinylbenzoquinone [2,5-diaziridinyl-3,6-bis(carboethoxyamino)-1,4-benzoquinone, diaziqone, NSC 182986] in high-grade gliomas. *Cancer Res* 1983;43:6102–5.
- Pink JJ, Planchon SM, Tagliarino C, Varnes ME, Siegel D, Boothman DA. NAD(P)H:Quinone oxidoreductase activity is the principal determinant of beta-lapachone cytotoxicity. *J Biol Chem* 2000;275:5416–24.
- Reinicke KE, Bey EA, Bentle MS, Pink JJ, Ingalls ST, Hoppel CL, et al. Development of beta-lapachone prodrugs for therapy against human cancer cells with elevated NAD(P)H:quinone oxidoreductase 1 levels. *Clin Cancer Res* 2005;11:3055–64.
- Blanco E, Bey EA, Khemtong C, Yang SG, Setti-Guthi J, Chen H, et al. Beta-lapachone micellar nanotherapeutics for non-small cell lung cancer therapy. *Cancer Res* 2010;70:3896–904.
- Bair JS, Palchoudhuri R, Hergenrother PJ. Chemistry and biology of deoxybenzoquinone, a potent inducer of cancer cell death. *J Am Chem Soc* 2010;132:5469–78.
- Tudor G, Gutierrez P, Aguilera-Gutierrez A, Sausville EA. Cytotoxicity and apoptosis of benzoquinones: redox cycling, cytochrome c release, and BAD protein expression. *Biochem Pharmacol* 2003;65:1061–75.
- Wuerzberger SM, Pink JJ, Planchon SM, Byers KL, Bornmann WG, Boothman DA. Induction of apoptosis in MCF-7:WS8 breast cancer cells by beta-lapachone. *Cancer Res* 1998;58:1876–85.
- Li LS, Bey EA, Dong Y, Meng J, Patra B, Yan J, et al. Modulating endogenous NQO1 levels identifies key regulatory mechanisms of action of beta-lapachone for pancreatic cancer therapy. *Clin Cancer Res* 2011;17:275–85.
- Criddle DN, Gillies S, Baumgartner-Wilson HK, Jaffar M, Chinje EC, Passmore S, et al. Menadione-induced reactive oxygen species generation via redox cycling promotes apoptosis of murine pancreatic acinar cells. *J Biol Chem* 2006;281:40485–92.
- Siegel D, Franklin WA, Ross D. Immunohistochemical detection of NAD(P)H:quinone oxidoreductase in human lung and lung tumors. *Clin Cancer Res* 1998;4:2065–70.
- Siegel D, Ryder J, Ross D. NAD(P)H: quinone oxidoreductase 1 expression in human bone marrow endothelial cells. *Toxicol Lett* 2001;125:93–8.
- Begleiter A, Fourie J. Induction of NQO1 in cancer cells. *Methods Enzymol* 2004;382:320–51.
- Boothman DA, Meyers M, Fukunaga N, Lee SW. Isolation of x-ray-inducible transcripts from radioresistant human melanoma cells. *Proc Natl Acad Sci U S A* 1993;90:7200–4.
- Choi EK, Terai K, Ji IM, Kook YH, Park KH, Oh ET, et al. Upregulation of NAD(P)H:quinone oxidoreductase by radiation potentiates the effect of bioreductive beta-lapachone on cancer cells. *Neoplasia* 2007;9:634–42.
- Marin A, Lopez de Cerain A, Hamilton E, Lewis AD, Martinez-Penuela JM, Idoate MA, et al. DT-diaphorase and cytochrome B5 reductase in human lung and breast tumours. *Br J Cancer* 1997;76:923–9.
- Lewis AM, Ough M, Hinkhouse MM, Tsao MS, Oberley LW, Cullen JJ. Targeting NAD(P)H:quinone oxidoreductase (NQO1) in pancreatic cancer. *Mol Carcinogenesis* 2005;43:215–24.
- Mikami K, Naito M, Ishiguro T, Yano H, Tomida A, Yamada T, et al. Immunological quantitation of DT-diaphorase in carcinoma cell lines and clinical colon cancers: advanced tumors express greater levels of DT-diaphorase. *Jpn J Cancer Res* 1998;89:910–5.
- Tagliarino C, Pink JJ, Dubyak GR, Nieminen AL, Boothman DA. Calcium is a key signaling molecule in beta-lapachone-mediated cell death. *J Biol Chem* 2001;276:19150–9.

# Cancer Research

The Journal of Cancer Research (1916–1930) | The American Journal of Cancer (1931–1940)

## An NQO1 Substrate with Potent Antitumor Activity That Selectively Kills by PARP1-Induced Programmed Necrosis

Xiumei Huang, Ying Dong, Erik A. Bey, et al.

*Cancer Res* 2012;72:3038-3047. Published OnlineFirst April 24, 2012.

**Updated version** Access the most recent version of this article at:  
doi:[10.1158/0008-5472.CAN-11-3135](https://doi.org/10.1158/0008-5472.CAN-11-3135)

**Supplementary Material** Access the most recent supplemental material at:  
<http://cancerres.aacrjournals.org/content/suppl/2012/04/24/0008-5472.CAN-11-3135.DC1.html>

**Cited articles** This article cites 26 articles, 14 of which you can access for free at:  
<http://cancerres.aacrjournals.org/content/72/12/3038.full.html#ref-list-1>

**Citing articles** This article has been cited by 3 HighWire-hosted articles. Access the articles at:  
<http://cancerres.aacrjournals.org/content/72/12/3038.full.html#related-urls>

**E-mail alerts** [Sign up to receive free email-alerts](#) related to this article or journal.

**Reprints and Subscriptions** To order reprints of this article or to subscribe to the journal, contact the AACR Publications Department at [pubs@aacr.org](mailto:pubs@aacr.org).

**Permissions** To request permission to re-use all or part of this article, contact the AACR Publications Department at [permissions@aacr.org](mailto:permissions@aacr.org).
